# Supplementary material
Source: PubMed Central journal article supplement (PMC2906912)
Supplement: 1004431107_pnas.201004431SI.pdf [file 1004431107_pnas.201004431SI.pdf]

# Supporting Information

Sarkar et al. 10.1073/pnas.1004431107

Table S1. Effect of caloric intake on life span

| Genotype                                                                                        | O.D. 625 nm |       |
|-------------------------------------------------------------------------------------------------|-------------|-------|
|                                                                                                 | Starved     | Fed   |
| <i>w<sup>1118</sup>/UAS-Mgat1;Mgat1<sup>1</sup>/Mgat1<sup>1</sup>;+ELAV-GeneSwitch (-RU486)</i> | 0.204       | 0.157 |
| <i>w<sup>1118</sup>/UAS-Mgat1;Mgat1<sup>1</sup>/Mgat1<sup>1</sup>;+ELAV-GeneSwitch (+RU486)</i> | 0.209       | 0.162 |

The exact volume of a single meal of adult flies was determined for *Drosophila* using a diet that contains Blue No. 1 food dye. After feeding, the flies were homogenized and the amount of dye ingested was assayed with a spectrophotometer at a wavelength of 625 nm. Groups of 30 female flies, previously food deprived for 24 h (starved) or nonfood deprived (fed), were assayed. No differences in caloric intake were observed between control (-RU486) and experimental *Mgat1<sup>1</sup>*-null flies expressing wild-type *Mgat1* in the CNS (+RU486), indicating that caloric intake is not a factor in the prolongation of life span.

Table S2. Dietary restriction in *Drosophila*

| Genotype                                                                                         | Yeast, % | Mean life span | SD, days | SE   |
|--------------------------------------------------------------------------------------------------|----------|----------------|----------|------|
| <i>w<sup>1118</sup>/UAS-Mgat1;Mgat1<sup>1</sup>/Mgat1<sup>1</sup>; +ELAV-GeneSwitch (-RU486)</i> | 2        | 59.7           | 17.3     | 1.73 |
|                                                                                                  | 4        | 76.1           | 20.8     | 2.08 |
|                                                                                                  | 6        | 73.0           | 21.5     | 2.15 |
|                                                                                                  | 8        |                | 21.8     | 2.18 |
| <i>w<sup>1118</sup>/UAS-Mgat1;Mgat1<sup>1</sup>/Mgat1<sup>1</sup>; +ELAV-GeneSwitch (+RU486)</i> | 2        | 117            | 33.7     | 3.37 |
|                                                                                                  | 4        | 89.6           | 26.4     | 2.64 |
|                                                                                                  | 6        | 89.7           | 27.9     | 2.79 |
|                                                                                                  | 8        | 84.6           | 29.2     | 2.92 |
| <i>w<sup>1118</sup>;Mgat<sup>+9</sup>/Mgat<sup>+9</sup> (wild type)</i>                          | 2        | 76.0           | 24.9     | 2.49 |
|                                                                                                  | 4        | 75.2           | 24.8     | 2.48 |
|                                                                                                  | 6        | 67.0           | 24.1     | 2.41 |
|                                                                                                  | 8        | 67.7           | 23.7     | 2.37 |
| <i>w<sup>1118</sup>/UAS-Mgat1;Mgat<sup>+9</sup>/Mgat<sup>+9</sup>; +ELAV-GeneSwitch (-RU486)</i> | 2        | 125            | 14.7     | 1.47 |
|                                                                                                  | 4        | 130            | 11.8     | 1.18 |
|                                                                                                  | 8        | 136            | 11.2     | 1.12 |
|                                                                                                  | 12       | 127            | 18.9     | 1.89 |
| <i>w<sup>1118</sup>/UAS-Mgat1;Mgat<sup>+9</sup>/Mgat<sup>+9</sup>; +ELAV-GeneSwitch (+RU486)</i> | 2        | 135            | 16.0     | 1.60 |
|                                                                                                  | 4        | 133            | 11.9     | 1.19 |
|                                                                                                  | 8        | 127            | 12.4     | 1.24 |
|                                                                                                  | 12       | 123            | 11.1     | 1.11 |
| <i>w<sup>1118</sup>/UAS-Mgat1;Mgat<sup>+9</sup>/Mgat<sup>+9</sup> (no GeneSwitch)</i>            | 2        | 103            | 14.4     | 1.44 |
|                                                                                                  | 4        | 103            | 17.8     | 1.78 |
|                                                                                                  | 8        | 98.9           | 15.7     | 1.57 |
|                                                                                                  | 12       | 105            | 11.3     | 1.13 |
| <i>w<sup>1118</sup>;Mgat<sup>+9</sup>/Mgat<sup>+9</sup>;+ELAV-GeneSwitch (no transgene)</i>      | 2        | 84.5           | 14.3     | 1.43 |
|                                                                                                  | 4        | 86.1           | 17.3     | 1.73 |
|                                                                                                  | 8        | 95.1           | 14.8     | 1.48 |
|                                                                                                  | 12       | 87.7           | 17.2     | 1.72 |

Mean life spans with SDs and SEs of adult *Drosophila* maintained on varying concentrations of dietary yeast are shown. All life span analyses were carried out with 100 flies.

**Table S3. Comparison of life spans**

| Fly genotype                                                      | Days/% increase |         | References      |
|-------------------------------------------------------------------|-----------------|---------|-----------------|
|                                                                   | Mean            | Maximum |                 |
| <i>Mgat1</i> <sup>-/-</sup>                                       | 11              | 15      | Table 1, line E |
| <i>Mgat1</i> <sup>-/-</sup> , transgene, -RU486                   | 54              | 70      | Table 1, line F |
| <i>Mgat1</i> <sup>-/-</sup> , transgene, +RU486                   | 127/135         | 165/136 | Table 1, line G |
| Wild type                                                         | 73              | 93      | Table 1, line I |
| Wild type, transgene, -RU486                                      | 125             | 142     | Table 1, line J |
| Wild type, transgene, +RU486                                      | 136/9           | 160/13  | Table 1, line K |
| <i>Superoxide dismutase (SOD)</i>                                 |                 |         | (1)             |
| Control                                                           | 45              | 56      |                 |
| SOD overexpression                                                | 64/42           | 73/30   |                 |
| <i>Protein carboxyl methyltransferase (PCMT)</i>                  |                 |         | (2)             |
| Control                                                           | 31              | 42      |                 |
| PCMT overexpression                                               | 46/48           | 52/24   |                 |
| Mutations of <i>insulin receptor (InR)</i> substrate <i>Chico</i> |                 |         | (3)             |
| Control                                                           | 44              | 58      |                 |
| <i>InR</i> mutation                                               | 65/48           | 85/47   |                 |
| Mutations of <i>Indy (I'm Not Dead Yet)</i>                       |                 |         | (4)             |
| Control                                                           | 48              | 62      |                 |
| <i>Indy</i> mutation                                              | 76/58           | 90/45   |                 |
| Mutations of <i>methuselah (mth)</i>                              |                 |         | (5)             |
| Control                                                           | 57              | 75      |                 |
| <i>mth</i> mutation                                               | 77/35           | 110/47  |                 |

1. Parkes TL, et al. (1998) Extension of *Drosophila* lifespan by overexpression of human SOD1 in motorneurons. *Nat Genet* 19:171–174.
2. Chavous DA, Jackson FR, O'Connor CM (2001) Extension of the *Drosophila* lifespan by overexpression of a protein repair methyltransferase. *Proc Natl Acad Sci USA* 98:14814–14818.
3. Clancy DJ, et al. (2001) Extension of life-span by loss of CHICO, a *Drosophila* insulin receptor substrate protein. *Science* 292:104–106.
4. Rogina B, Reenan RA, Nilsen SP, Helfand SL (2000) Extended life-span conferred by cotransporter gene mutations in *Drosophila*. *Science* 290:2137–2140.
5. Lin YJ, Seroude L, Benzer S (1998) Extended life-span and stress resistance in the *Drosophila* mutant methuselah. *Science* 282:943–946.
